# Supplementary material for: The achievement of comprehensive control targets among type 2 diabetes mellitus patients of different ages
Source: publisher site journal article supplement (doi:10.18632/aging.103358), 2020-07-22
Supplement: Supplementary file [file aging-v12i14-103358-supplementary-material-SD1.pdf]

## SUPPLEMENTARY TABLES

**Supplementary Table 1. Characteristics of male patients with T2DM in different age groups.**

| Characteristic              | Age (years)                      |                                  |                                  | P value |
|-----------------------------|----------------------------------|----------------------------------|----------------------------------|---------|
|                             | <60                              | 60-80                            | ≥80                              |         |
| Number of patients          | 648                              | 1089                             | 387                              |         |
| Diabetic duration (years)   | 0.33 (0.08-4.83) <sup>a</sup>    | 3.42 (0.17-10.17) <sup>b</sup>   | 8.17 (0.63-15.71) <sup>c</sup>   | <0.001  |
| <5 [n (%)]                  | 491 (75.77) <sup>a</sup>         | 609 (55.92) <sup>b</sup>         | 156 (40.31) <sup>c</sup>         | <0.001  |
| 5-10 [n (%)]                | 91 (14.04) <sup>a</sup>          | 187 (17.17) <sup>a</sup>         | 57 (14.73) <sup>a</sup>          |         |
| ≥10 [n (%)]                 | 66 (10.19) <sup>a</sup>          | 293 (26.91) <sup>b</sup>         | 174 (44.96) <sup>c</sup>         |         |
| Hypertension                |                                  |                                  |                                  | <0.001  |
| Yes                         | 248 (38.27) <sup>a</sup>         | 683 (62.72) <sup>b</sup>         | 296 (76.49) <sup>c</sup>         |         |
| No                          | 400 (61.73) <sup>a</sup>         | 406 (37.28) <sup>b</sup>         | 91 (23.51) <sup>c</sup>          |         |
| SDP (mmHg)                  | 125.5 (120.0-136.0) <sup>a</sup> | 130 (120-140) <sup>b</sup>       | 130 (120-140) <sup>c</sup>       | <0.001  |
| DBP (mmHg)                  | 80 (74-90) <sup>a</sup>          | 80 (70-84) <sup>b</sup>          | 73 (70-80) <sup>c</sup>          | <0.001  |
| BMI (kg/m <sup>2</sup> )    | 25.65 (23.59-27.76) <sup>a</sup> | 25.00 (23.26-27.10) <sup>b</sup> | 24.38 (22.34-26.38) <sup>c</sup> | <0.001  |
| FPG (mmol/L)                | 7.70 (6.50-9.60) <sup>a</sup>    | 7.00 (6.1-8.3) <sup>b</sup>      | 6.70 (5.90-7.87) <sup>c</sup>    | <0.001  |
| PPG (mmol/L)                | 12.90 (9.90-17.22) <sup>a</sup>  | 11.10 (9.00-15.00) <sup>b</sup>  | 11.00 (8.60-14.95) <sup>b</sup>  | <0.001  |
| HbA1c (%)                   | 8.3 (6.8-10.2) <sup>a</sup>      | 7.1 (6.3-8.9) <sup>b</sup>       | 6.9 (6.4-8.2) <sup>b</sup>       | <0.001  |
| TG (mmol/L)                 | 1.74 (1.21-2.71) <sup>a</sup>    | 1.37 (0.98-1.96) <sup>b</sup>    | 1.28 (0.86-1.72) <sup>c</sup>    | <0.001  |
| TC (mmol/L)                 | 4.77 (4.15-5.42) <sup>a</sup>    | 4.53 (3.91-5.17) <sup>b</sup>    | 4.38 (3.71-5.04) <sup>c</sup>    | <0.001  |
| LDL-C (mmol/L)              | 2.79 (2.29-3.36) <sup>a</sup>    | 2.75 (2.22-3.30) <sup>a</sup>    | 2.57 (1.99-3.15) <sup>c</sup>    | <0.001  |
| HDL-C (mmol/L)              | 0.99 (0.85-1.16) <sup>a</sup>    | 1.06 (0.90-1.25) <sup>b</sup>    | 1.09 (0.92-1.31) <sup>b</sup>    | <0.001  |
| Treatment [n (%)]           |                                  |                                  |                                  | 0.003   |
| Diet and exercise alone     | 123(18.98) <sup>a</sup>          | 187(17.17) <sup>a</sup>          | 58(14.99) <sup>a</sup>           |         |
| 1 OAD alone                 | 233(35.96) <sup>a</sup>          | 358(32.87) <sup>a</sup>          | 122(31.52) <sup>a</sup>          |         |
| 2 OADs alone                | 148(22.84) <sup>a</sup>          | 229(21.03) <sup>a</sup>          | 79(20.41) <sup>a</sup>           |         |
| ≥3 OADs alone               | 13(2.01) <sup>a</sup>            | 58(5.33) <sup>b</sup>            | 17(4.39) <sup>a,b</sup>          |         |
| Insulin alone               | 16(2.47) <sup>a</sup>            | 33(3.03) <sup>a,b</sup>          | 21(5.43) <sup>b</sup>            |         |
| Insulin+OAD                 | 115(17.75) <sup>a</sup>          | 224(20.57) <sup>a</sup>          | 90(23.26) <sup>a</sup>           |         |
| Antihypertensive agents use |                                  |                                  |                                  | <0.001  |
| Yes                         | 211(32.56) <sup>a</sup>          | 576(52.89) <sup>b</sup>          | 267(68.99) <sup>c</sup>          |         |
| No                          | 437(67.44)                       | 513(47.11)                       | 120(31.01)                       |         |
| ARB or ACEI use             |                                  |                                  |                                  | <0.001  |
| Yes                         | 166(25.62) <sup>a</sup>          | 368(33.79) <sup>b</sup>          | 174(44.96) <sup>c</sup>          |         |
| No                          | 482(74.38)                       | 721(66.21)                       | 213(55.04)                       |         |
| Lipid-lowering agent use    |                                  |                                  |                                  | 0.021   |
| Yes                         | 292(45.06) <sup>a</sup>          | 489(44.9) <sup>a</sup>           | 144(37.21) <sup>b</sup>          |         |
| No                          | 356(54.94)                       | 600(55.1)                        | 243(62.79)                       |         |
| Antiplatelet use            |                                  |                                  |                                  | <0.001  |
| Yes                         | 283(43.67) <sup>a</sup>          | 591(54.27) <sup>b</sup>          | 202(52.2) <sup>b</sup>           |         |
| No                          | 365(56.33)                       | 498(45.73)                       | 185(47.8)                        |         |

Data are expressed as the median (Q1-Q3) or numbers and percentages, n (%); P values for comparison over all 3 categories.

<sup>a, b, c</sup> Each different subscript letter denotes a subset of age categories whose column proportions differ significantly from each other at  $P < 0.05$ .

**Supplementary Table 2. Characteristics of female patients with T2DM in different age groups.**

| Characteristic            | Age (years)                   |                                |                                | P value |
|---------------------------|-------------------------------|--------------------------------|--------------------------------|---------|
|                           | <60                           | 60-80                          | ≥80                            |         |
| Number of patients        | 153                           | 571                            | 278                            |         |
| Diabetic duration (years) | 1.08 (0.71-5.42) <sup>a</sup> | 4.58 (0.17-11.08) <sup>b</sup> | 8.25 (2.54-15.73) <sup>c</sup> | <0.001  |
| <5 [n (%)]                | 111 (72.55) <sup>a</sup>      | 288 (50.44) <sup>b</sup>       | 104 (37.41) <sup>c</sup>       | <0.001  |
| 5-10 [n (%)]              | 24 (15.69) <sup>a</sup>       | 108 (18.91) <sup>a</sup>       | 47 (16.91) <sup>a</sup>        |         |
| ≥10 [n (%)]               | 18 (11.76) <sup>a</sup>       | 175 (30.65) <sup>b</sup>       | 127 (45.68) <sup>c</sup>       |         |
| Hypertension [n (%)]      |                               |                                |                                | <0.001  |
| Yes                       | 60 (39.22) <sup>a</sup>       | 368 (64.45) <sup>b</sup>       | 219 (78.78) <sup>c</sup>       |         |
| No                        | 93 (60.78)                    | 203 (35.55)                    | 59 (21.22)                     |         |
| SDP (mmHg)                | 120 (110-130) <sup>a</sup>    | 130 (120-140) <sup>b</sup>     | 130 (120-140) <sup>b</sup>     | <0.001  |
| DBP (mmHg)                | 75 (70-80) <sup>a</sup>       | 78 (70-80) <sup>a</sup>        | 70 (68-80) <sup>b</sup>        | <0.001  |
| BMI (kg/m <sup>2</sup> )  | 24.39 (22.19-26.71)           | 24.65 (22.58-27.18)            | 24.23 (22.31-27.11)            | 0.328   |
| FPG (mmol/L)              | 7.30 (6.20-8.90) <sup>a</sup> | 6.99 (6.00-8.20) <sup>b</sup>  | 6.68 (5.70-7.90) <sup>c</sup>  | <0.001  |
| PPG (mmol/L)              | 11.90 (9.20-16.00)            | 11.20 (8.80-15.10)             | 11.20 (8.90-14.65)             | 0.250   |
| HbA1c (%)                 | 7.8 (6.3-10.1)                | 7.2 (6.4-9.0)                  | 7.0 (6.5-8.1)                  | 0.046   |
| TG (mmol/L)               | 1.40 (0.97-2.09)              | 1.39 (1.00-2.00)               | 1.39 (1.02-1.83)               | 0.994   |
| TC (mmol/L)               | 4.80 (4.22-5.50)              | 4.80 (4.16-5.62)               | 4.63 (4.00-5.37)               | 0.107   |
| LDL-C (mmol/L)            | 2.84 (2.45-3.36)              | 2.80 (2.23-3.40)               | 2.71 (2.22-3.27)               | 0.078   |
| HDL-C (mmol/L)            | 1.13 (0.97-1.37)              | 1.17 (1.00-1.41)               | 1.16 (0.98-1.38)               | 0.318   |
| Treatment [n (%)]         |                               |                                |                                |         |
| Diet and exercise alone   | 23 (15.03)                    | 111 (19.44)                    | 43 (15.47)                     | 0.049   |
| 1 OADs alone              | 56 (36.60)                    | 161 (28.20)                    | 73 (26.26)                     |         |
| 2 OADs alone              | 27 (17.65)                    | 115 (20.14)                    | 57 (20.50)                     |         |
| ≥3 OADs alone             | 5 (3.27)                      | 42 (7.36)                      | 12 (4.32)                      |         |
| Insulin alone             | 3 (1.96)                      | 18 (3.15)                      | 7 (2.52)                       |         |
| Insulin + OADs            | 39 (25.49)                    | 124 (21.72)                    | 86 (30.94)                     |         |
| Antihypertensive agents   |                               |                                |                                | <0.001  |
| Yes                       | 43 (28.1) <sup>a</sup>        | 301 (52.71) <sup>b</sup>       | 194 (69.78) <sup>c</sup>       |         |
| No                        | 110 (71.9)                    | 270 (47.29)                    | 84 (30.22)                     |         |
| ARBs or ACEIs             |                               |                                |                                | <0.001  |
| Yes                       | 26 (16.99) <sup>a</sup>       | 198 (34.68) <sup>b</sup>       | 123 (44.24) <sup>c</sup>       |         |
| No                        | 127 (83.01)                   | 373 (65.32)                    | 155 (55.76)                    |         |
| Lipid-lowering agents     |                               |                                |                                | 0.032   |
| Yes                       | 57 (37.25) <sup>a</sup>       | 280 (49.04) <sup>b</sup>       | 133 (47.84) <sup>a,b</sup>     |         |
| No                        | 96 (62.75)                    | 291 (50.96)                    | 145 (52.16)                    |         |
| Antiplatelet agents       |                               |                                |                                | <0.001  |
| Yes                       | 55 (35.95) <sup>a</sup>       | 296 (51.84) <sup>b</sup>       | 155 (55.76) <sup>b</sup>       |         |
| No                        | 98 (64.05)                    | 275 (48.16)                    | 123 (44.24)                    |         |

Data are expressed as the median (Q1-Q3) or numbers and percentages, n (%); P values for comparison over all 3 categories. <sup>a, b, c</sup> Each different subscript letter denotes a subset of age categories whose column proportions differ significantly from each other at  $P < 0.05$ .
